# Supplementary material for: The preparation of hollow Fe3O4/Pd@C NCs to stabilize subminiature Pd nanoparticles for the reduction of 4-nitrophenol
Source: Royal Society of Chemistry journal article supplement (doi:10.1039/c9nj06165g), 2020-01-01
Supplement: c9nj06165g1.pdf [file c9nj06165g1.pdf]

**Supporting information for New Journal of Chemistry**

**Preparation of Hollow Fe<sub>3</sub>O<sub>4</sub>/Pd@C NCs to stabilize  
subminiature Pd nanoparticles for reduction of 4-nitrophenol**

Congcong Wang, Yixin Chen, Siyang Feng, Nan Zhang, Lin Shen, Kai Zhang\*, and

Bai Yang

*State Key Laboratory of Supramolecular Structure and Materials, College of  
Chemistry, Jilin University, Changchun, 130012, People's Republic of China*

*E-mail: zk@jlu.edu.cn*

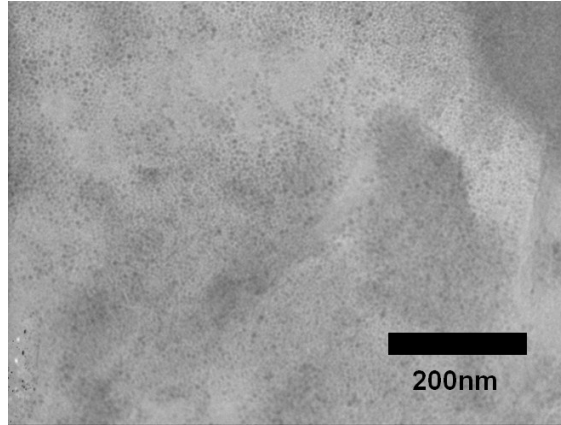

**Fig. S1** TEM image of the PVP-Fe<sub>3</sub>O<sub>4</sub>.

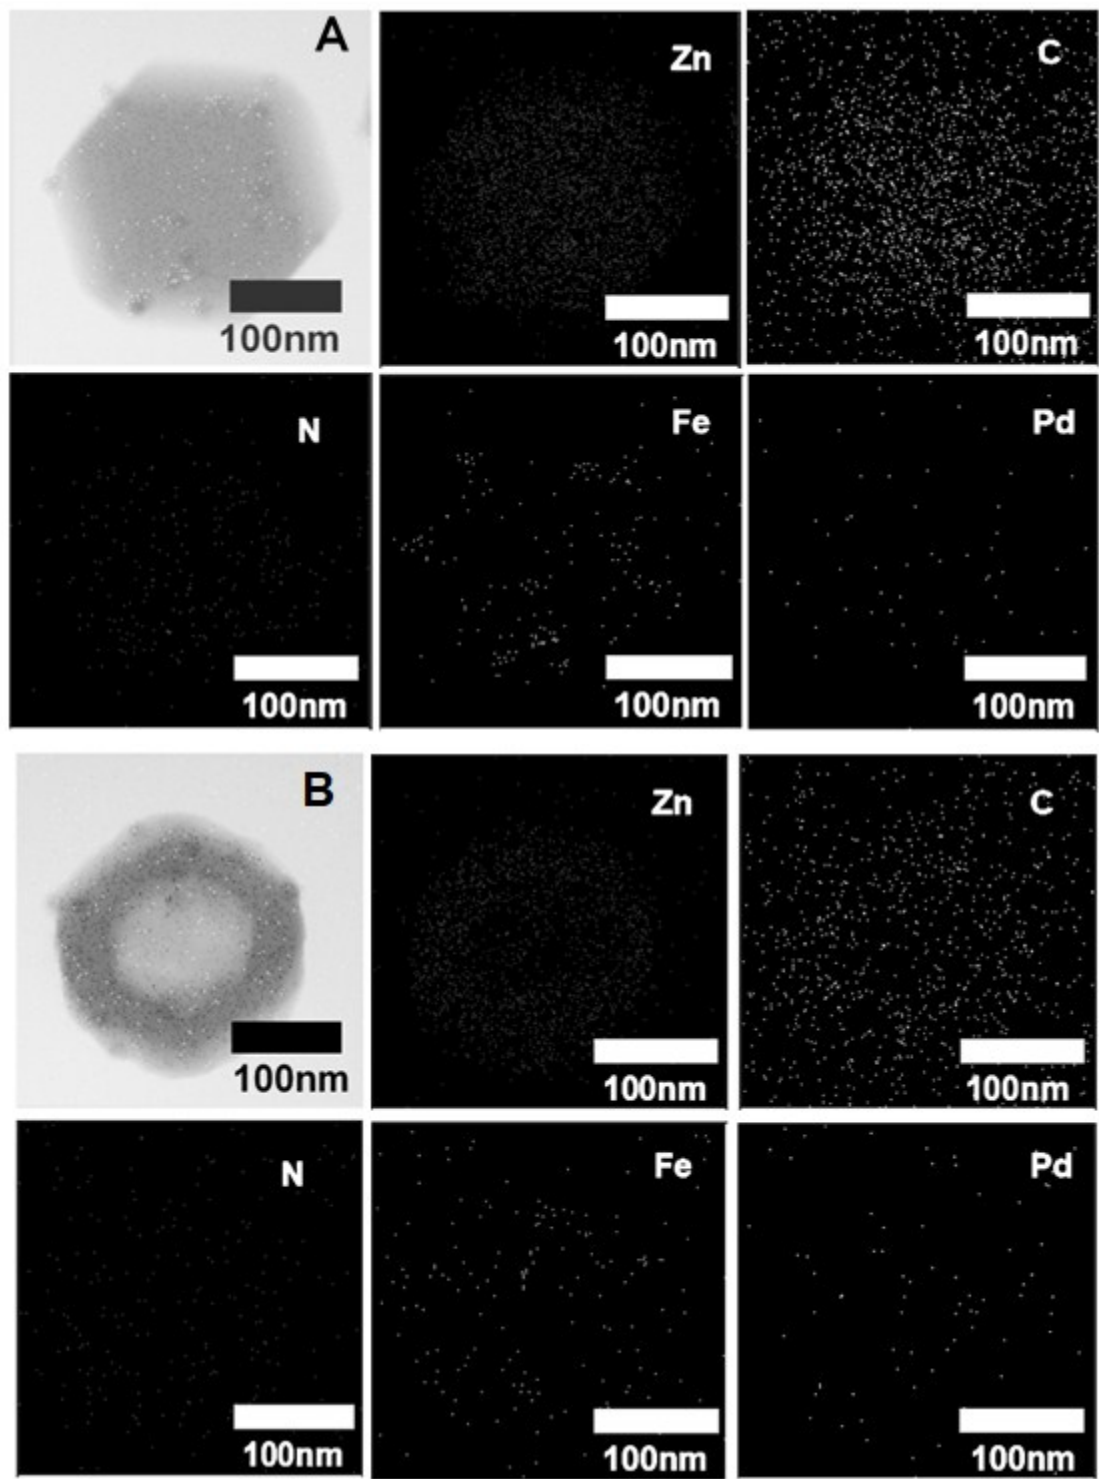

**Fig. S2** Elemental mapping images of Fe (green), Pd(yellow), N (pink), C (blue) and Zn (red) of (A) Fe<sub>3</sub>O<sub>4</sub>/Pd<sup>2+</sup>@ZIF-8, (B) Fe<sub>3</sub>O<sub>4</sub>/Pd<sup>2+</sup>@PDA NCs.

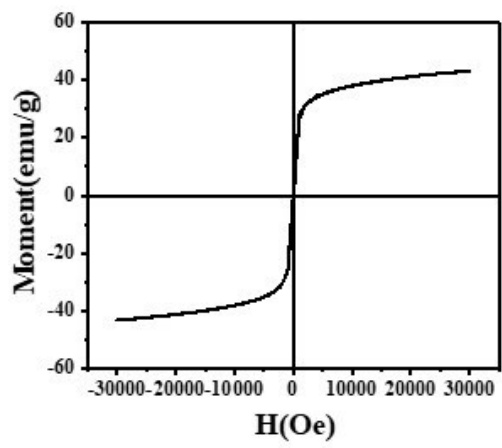

**Fig. S3** M-H curve of OA-stabilized Fe<sub>3</sub>O<sub>4</sub> NPs.

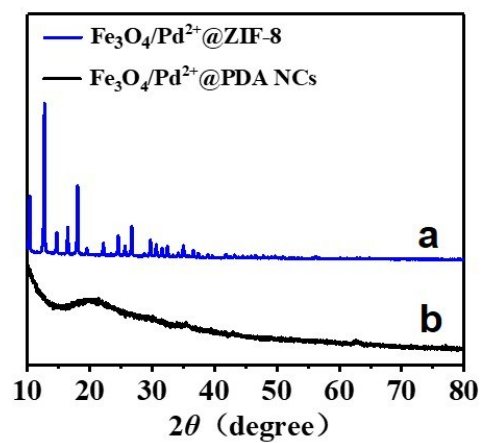

**Fig. S4** XRD patterns of  $\text{Fe}_3\text{O}_4/\text{Pd}^{2+}@ZIF-8$  (a) and  $\text{Fe}_3\text{O}_4/\text{Pd}^{2+}@PDA\text{ NCs}$  (b).

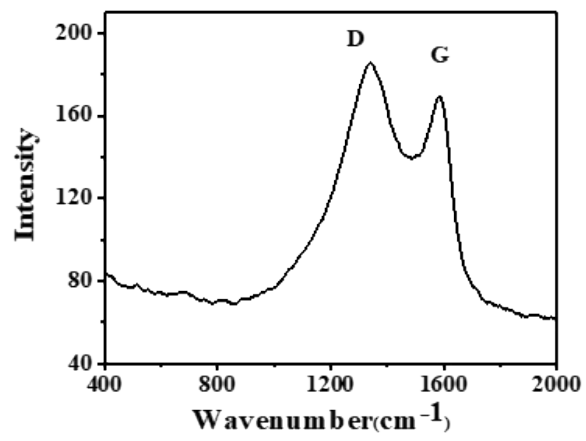

**Fig. S5** Raman spectrum of Fe<sub>3</sub>O<sub>4</sub>/Pd@C NCs.

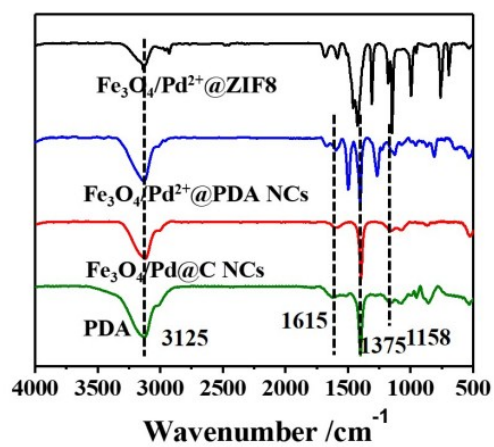

**Fig. S6** FT-IR spectrums of Fe<sub>3</sub>O<sub>4</sub>/Pd<sup>2+</sup>@ZIF-8 (black), Fe<sub>3</sub>O<sub>4</sub>/Pd<sup>2+</sup>@PDA NCs (blue), Fe<sub>3</sub>O<sub>4</sub>/Pd@C NCs and pure PDA (green).

**Table S1** Elemental analysis results in the XPS spectrum of Fe<sub>3</sub>O<sub>4</sub>/Pd@C NCs catalysts.

| <b>Elements</b> | <b>At. /%</b> |
|-----------------|---------------|
| <b>C</b>        | <b>88.80</b>  |
| <b>N</b>        | <b>7.01</b>   |
| <b>Fe</b>       | <b>3.89</b>   |
| <b>Pd</b>       | <b>0.30</b>   |



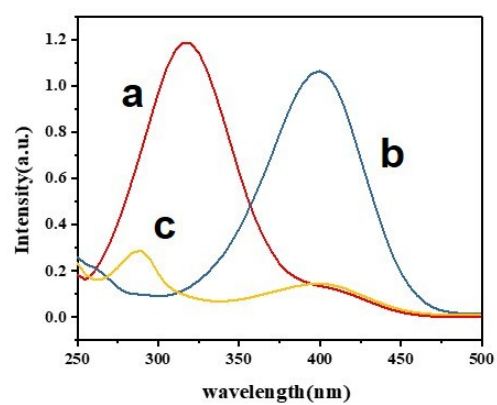

**Fig. S7** UV-vis absorption spectra of 4-NP (a); 4-NP + NaBH<sub>4</sub> (b) and 4-AP (c).

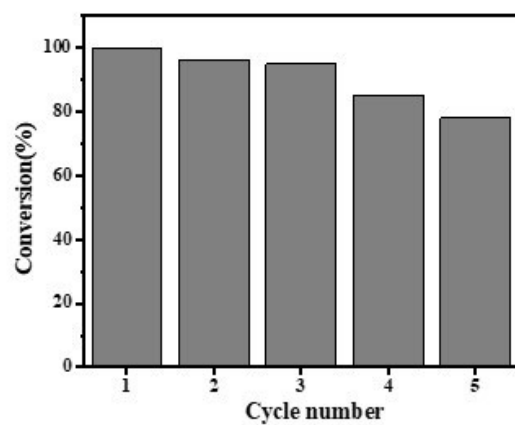

**Fig. S8** Conversion of 4-NP in 5 successive cycles of reduction with 5.0 mg of  $\text{Fe}_3\text{O}_4/\text{Pd}@C$  NCs catalysts.

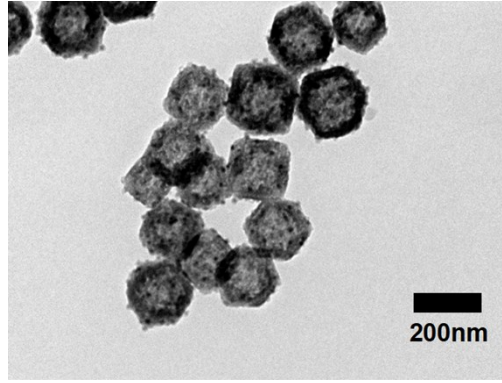

**Fig. S9** TEM image of  $\text{Fe}_3\text{O}_4/\text{Pd}@\text{C}$  NCs after 5 cycles.

**Table S2** Comparison of rate constant values for the 4-NP reduction to 4-AP using various catalysts

| catalyst                                        | $k$ (s <sup>-1</sup> ) | Ref.      |
|-------------------------------------------------|------------------------|-----------|
| Fe <sub>3</sub> O <sub>4</sub> /Pd@C NCs        | 3.26×10 <sup>-3</sup>  | This work |
| p(AMPS)-Co composite                            | 2.00×10 <sup>-3</sup>  | 46        |
| rGO/Pd-Fe <sub>3</sub> O <sub>4</sub> /PPy      | 3.20×10 <sup>-3</sup>  | 47        |
| Ni NPs                                          | 2.67×10 <sup>-3</sup>  | 48        |
| Pd-graphene nanohybrid                          | 2.67×10 <sup>-3</sup>  | 49        |
| Au-Pd bimetallic NPs/graphene                   | 1.45×10 <sup>-2</sup>  | 50        |
| Dumbbell-like Au-Fe <sub>3</sub> O <sub>4</sub> | 1.45×10 <sup>-2</sup>  | 51        |
